# Supplementary material
Source: ML conference proceedings conference paper supplement (https://openaccess.thecvf.com/content/CVPR2026/html/Jiang_Your_Classifier_Can_CVPR_2026_paper.html)
Supplement: Supplementary file 1 [file Jiang_Your_Classifier_Can_CVPR_2026_supplemental.pdf]

# Your Classifier Can Do More: Towards Balancing the Gaps in Classification, Robustness, and Generation

## Supplementary Material

Table 1. Robustness (%) of EB-JDAT-JEM++ on CIFAR-10.

| Model | APGD-CE | APGD-DLR | FAB   | SQUARE |
|-------|---------|----------|-------|--------|
| Ours  | 64.46   | 65.29    | 90.52 | 70.72  |

Table 2. Comparative robustness (%) of EB-JDAT-JEM++ on CIFAR-10 under transfer attacks from a PGD-AT surrogate.

| Model  | PGD          | MI-FGSM      | VMI-FGSM     | VNI-FGSM     |
|--------|--------------|--------------|--------------|--------------|
| TRADES | 22.57        | 21.68        | 21.54        | 21.97        |
| Ours   | <b>39.06</b> | <b>38.33</b> | <b>37.72</b> | <b>39.19</b> |

Table 3. Robustness (%) of EB-JDAT-JEM++ on CIFAR-10 under APGD-CE (varying distortion/iterations) and EOT-PGD.

|       | APGD-CE: distortion bound |       |        |        | APGD-CE: iterations |       |       |       | EOT-PGD: distortion bound |       |        |        |
|-------|---------------------------|-------|--------|--------|---------------------|-------|-------|-------|---------------------------|-------|--------|--------|
| Model | 4/255                     | 8/255 | 16/255 | 32/255 | 1                   | 10    | 20    | 50    | 4/255                     | 8/255 | 16/255 | 32/255 |
| Ours  | 80.28                     | 64.46 | 30.63  | 2.29   | 68.43               | 64.97 | 64.46 | 64.32 | 80.97                     | 64.68 | 34.24  | 7.11   |

### 1. Gradient obfuscation analysis

Tab. 1 reports a per-attack AA breakdown, without using EOT, Tab. 2 evaluates transfer attacks using PGD-AT as surrogate model, where EB-JDAT-JEM++ consistently outperforms a strong AT baseline. Following [1], we check three masking indicators: (i) robustness not decreasing with larger distortion bound, (ii) one-step attacks outperforming iterative ones, and (iii) robustness relying on stochastic gradients. Tab. 3 shows that robustness decreases with larger distortion bound, iterative attacks outperform one-step, and EOT-PGD is at least as strong as standard PGD, jointly contradicting gradient-masking indicators.

### 2. Initialization for generation

For fairness, we use the default initialization of each JEM variant, as mismatched training and evaluation initializations may lead to generation failure. JEM++/SADAJEM use informative init, while JEM (FID 38.40) uses random init, under which EB-JDAT-JEM achieves competitive generation (FID 39.43).

### 3. Limitation And Discussion

Training EB-JDAT on complex, high-dimensional data remains challenging. This challenge is also encountered by JEMs, including JEM [2], JEM++ [3] and SADAJEM [4].

This instability arises from the typically sharp probability distribution of real data in high-dimensional space, which leads to inaccurate guidance for image sampling in regions with low data density. Although the approach we propose is a general and flexible optimization framework for all JEMs, considering training stability, we recommend training within faster and more stable JEM variants, such as JEM++ and SADAJEM. Nevertheless, our method significantly enhances the robustness of JEMs, surpassing SOTA AT [5], while incurring only a slight degradation in accuracy and generative performance, thereby achieving the **best overall trade-off** among robustness (68.76%), accuracy (90.39%), and generation (FID=27.42).

Scaling EB-JDAT to large-scale datasets remains challenging due to the high computational cost of adversarial training and the additional overhead of EBM sampling, we will clarify this limitation and explore latent-space optimization on larger datasets in future work.

### References

- [1] Anish Athalye, Nicholas Carlini, and David Wagner. Obfuscated gradients give a false sense of security: Circumventing defenses to adversarial examples. In *International conference on machine learning (ICML)*, pages 274–283. PMLR, 2018. 1
- [2] Will Grathwohl, Kuan-Chieh Wang, Joern-Henrik Jacobsen, David Duvenaud, Mohammad Norouzi, and Kevin Swersky. Your classifier is secretly an energy based model and you should treat it like one. In *International Conference on Learning Representations (ICLR)*, 2020. 1
- [3] Xiulong Yang and Shihao Ji. Jem++: Improved techniques for training jem. In *International Conference on Computer Vision (ICCV)*, pages 6494–6503, 2021. 1
- [4] Xiulong Yang, Qing Su, and Shihao Ji. Towards bridging the performance gaps of joint energy-based models. In *Conference on Computer Vision and Pattern Recognition (CVPR)*, pages 15732–15741, 2023. 1
- [5] Kejia Zhang, Juanjuan Weng, Shaozi Li, and Zhiming Luo. Towards adversarial robustness via debiased high-confidence logit alignment. In *Proceedings of the IEEE/CVF International Conference on Computer Vision (ICCV)*, pages 2783–2792, 2025. 1
